# Supplementary material for: The effect of ring sizes and alkali metal cations on interaction energy, charge transfer and nonlinear optical properties of crown ether derivatives
Source: Royal Society of Chemistry journal article supplement (doi:10.1039/c5ra01145k), 2015-01-01
Supplement: c5ra01145k1.pdf [file c5ra01145k1.pdf]

**Supporting Information for**  
**The Effect of Ring Sizes and Alkali Metal Cations on Interaction**  
**Energy, Charge Transfer and Nonlinear Optical Properties of Crown**  
**Ether Derivatives**

Ying Gao, Rong-Lin Zhong, Hong-Liang Xu\*, Shi-Ling Sun, and Zhong-Min Su\*

Institute of Functional Material Chemistry, Faculty of Chemistry, Northeast Normal  
University, Changchun 130024, Jilin, People's Republic of China

E-mail: [hlxu@nenu.edu.cn](mailto:hlxu@nenu.edu.cn), [zmsu@nenu.edu.cn](mailto:zmsu@nenu.edu.cn)

Content

|                                                                     |    |
|---------------------------------------------------------------------|----|
| Table 1 Detailed O–M distances.....                                 | S2 |
| Table 2 Detailed $\rho_b$ O–M and $\nabla^2\rho_b$ O1–M values..... | S3 |
| Optimized structures.....                                           | S4 |

Table S1. The detailed O–M and O–O distances of compounds **1**, **2** and **3** and **N\*M** (N = 1, 2 and 3, M = Li<sup>+</sup>, Na<sup>+</sup> and K<sup>+</sup>).

|       | <b>1</b> | <b>1*Li</b> | <b>1*Na</b> | <b>1*K</b> |
|-------|----------|-------------|-------------|------------|
| O3–M  |          | 1.909       | 2.340       | 2.752      |
| O4–M  |          | 1.897       | 2.435       | 3.366      |
| O1–M  |          | 1.907       | 2.303       | 2.722      |
| O2–M  |          | 1.877       | 2.230       | 2.602      |
| O1–O3 | 3.047    | 3.816       | 4.000       | 3.836      |
| O2–O4 | 4.633    | 3.297       | 3.704       | 4.000      |
|       | <b>2</b> | <b>2*Li</b> | <b>2*Na</b> | <b>2*K</b> |
| O4–M  |          | 2.185       | 2.308       | 2.736      |
| O1–M  |          | 2.224       | 2.298       | 2.680      |
| O3–M  |          | 2.194       | 2.311       | 2.710      |
| O2–M  |          | 2.215       | 2.296       | 2.677      |
| O5–M  |          | 2.213       | 2.313       | 2.708      |
| O2–O4 | 4.403    | 4.194       | 4.375       | 4.666      |
| O1–O4 | 4.431    | 4.196       | 4.376       | 4.656      |
| O2–O5 | 4.443    | 4.181       | 4.364       | 4.344      |
| O3–O5 | 4.642    | 4.209       | 4.392       | 4.102      |
| O1–O3 | 4.495    | 4.184       | 4.363       | 4.326      |
|       | <b>3</b> | <b>3*Li</b> | <b>3*Na</b> | <b>3*K</b> |
| O5–M  |          | 2.072       | 2.535       | 2.75       |
| O6–M  |          | 2.145       | 2.571       | 2.725      |
| O1–M  |          | 2.161       | 2.712       | 2.758      |
| O2–M  |          | 2.111       | 2.746       | 2.782      |
| O3–M  |          | 2.289       | 2.611       | 2.739      |
| O4–M  |          | 2.125       | 2.683       | 2.755      |
| O3–O6 | 5.055    | 3.516       | 5.123       | 5.451      |
| O1–O4 | 5.852    | 3.460       | 5.393       | 5.492      |
| O2–O5 | 6.101    | 4.172       | 5.272       | 5.444      |

Table S2. The topological properties and energy properties at the bond critical points (BCPs) of O–M.  
(All values are in unites of au).

|                       | <b>1*Li</b> | <b>1*Na</b> | <b>1*K</b> |
|-----------------------|-------------|-------------|------------|
| $\rho_b$ O1–M         | 0.0320      | 0.0217      | 0.0167     |
| $\rho_b$ O2–M         | 0.0342      | 0.0260      | 0.0224     |
| $\rho_b$ O3–M         | 0.0319      | 0.0207      | 0.0165     |
| $\rho_b$ O4–M         | 0.0330      | 0.0166      |            |
| $\nabla^2\rho_b$ O1–M | 0.2347      | 0.1352      | 0.0742     |
| $\nabla^2\rho_b$ O2–M | 0.2602      | 0.1725      | 0.1018     |
| $\nabla^2\rho_b$ O3–M | 0.2324      | 0.1228      | 0.0699     |
| $\nabla^2\rho_b$ O4–M | 0.2446      | 0.0947      |            |
|                       | <b>2*Li</b> | <b>2*Na</b> | <b>2*K</b> |
| $\rho_b$ O1–M         | 0.0137      | 0.0218      | 0.0184     |
| $\rho_b$ O2–M         | 0.0134      | 0.0217      | 0.0183     |
| $\rho_b$ O3–M         | 0.0144      | 0.0217      | 0.0182     |
| $\rho_b$ O4–M         | 0.0154      | 0.0220      | 0.0166     |
| $\rho_b$ O5–M         | 0.0151      | 0.0218      | 0.0181     |
| $\nabla^2\rho_b$ O1–M | 0.0843      | 0.1370      | 0.0833     |
| $\nabla^2\rho_b$ O2–M | 0.0821      | 0.1364      | 0.0827     |
| $\nabla^2\rho_b$ O3–M | 0.0860      | 0.1327      | 0.0793     |
| $\nabla^2\rho_b$ O4–M | 0.0932      | 0.1346      | 0.0728     |
| $\nabla^2\rho_b$ O5–M | 0.097       | 0.1332      | 0.0789     |
|                       | <b>3*Li</b> | <b>3*Na</b> | <b>3*K</b> |
| $\rho_b$ O1–M         | 0.0162      | 0.0080      | 0.0157     |
| $\rho_b$ O2–M         | 0.0175      | 0.0074      | 0.0149     |
| $\rho_b$ O3–M         | 0.0178      | 0.0106      | 0.0173     |
| $\rho_b$ O4–M         |             | 0.0090      | 0.0164     |
| $\rho_b$ O5–M         | 0.0205      | 0.0121      | 0.0162     |
| $\rho_b$ O6–M         | 0.0171      | 0.0117      | 0.0177     |
| $\nabla^2\rho_b$ O1–M | 0.1007      | 0.0428      | 0.0679     |
| $\nabla^2\rho_b$ O2–M | 0.1140      | 0.0395      | 0.0643     |
| $\nabla^2\rho_b$ O3–M | 0.1117      | 0.0558      | 0.0726     |
| $\nabla^2\rho_b$ O4–M |             | 0.0477      | 0.0693     |
| $\nabla^2\rho_b$ O5–M | 0.1324      | 0.0665      | 0.0693     |
| $\nabla^2\rho_b$ O6–M | 0.1062      | 0.0626      | 0.0748     |

## Optimized Structures

### Compound 1

|   |   |           |           |           |
|---|---|-----------|-----------|-----------|
| 6 | 0 | 0.109787  | -1.264943 | 0.101350  |
| 6 | 0 | 0.986457  | -0.185688 | -0.150614 |
| 6 | 0 | 2.362583  | -0.376590 | -0.166330 |
| 6 | 0 | 2.902889  | -1.669569 | 0.051246  |
| 6 | 0 | 2.044171  | -2.731582 | 0.306067  |
| 6 | 0 | 0.663189  | -2.533034 | 0.337442  |
| 6 | 0 | -1.344265 | -1.115767 | 0.131064  |
| 6 | 0 | -2.051524 | 0.010729  | -0.121023 |
| 1 | 0 | 0.584657  | 0.806280  | -0.320204 |
| 1 | 0 | 2.475901  | -3.710618 | 0.490002  |
| 1 | 0 | 0.005030  | -3.373960 | 0.539561  |
| 1 | 0 | -1.533872 | 0.930709  | -0.383061 |
| 6 | 0 | -5.803542 | -0.027671 | 0.083942  |
| 6 | 0 | -5.381684 | 1.264260  | -0.276566 |
| 6 | 0 | -6.298574 | 2.292030  | -0.496581 |
| 6 | 0 | -7.657450 | 2.001226  | -0.347471 |
| 6 | 0 | -8.082523 | 0.716727  | 0.011668  |
| 6 | 0 | -7.153642 | -0.311372 | 0.230671  |
| 6 | 0 | -4.560965 | -0.884797 | 0.241748  |
| 6 | 0 | -3.489744 | 0.179166  | -0.092744 |
| 1 | 0 | -5.954446 | 3.283652  | -0.774326 |
| 1 | 0 | -8.394980 | 2.782336  | -0.512269 |
| 1 | 0 | -9.144285 | 0.513264  | 0.122113  |
| 1 | 0 | -7.496480 | -1.305598 | 0.509232  |
| 7 | 0 | -3.982973 | 1.356794  | -0.374630 |
| 6 | 0 | -4.564388 | -2.050826 | -0.773677 |
| 1 | 0 | -5.414559 | -2.713842 | -0.577137 |
| 1 | 0 | -3.649261 | -2.647612 | -0.709839 |
| 1 | 0 | -4.656213 | -1.677570 | -1.798636 |
| 6 | 0 | -4.431337 | -1.407846 | 1.690637  |
| 1 | 0 | -5.278148 | -2.061594 | 1.928991  |
| 1 | 0 | -4.430513 | -0.580517 | 2.407420  |
| 1 | 0 | -3.510817 | -1.982266 | 1.833645  |
| 6 | 0 | 5.000950  | -1.649230 | -1.114498 |
| 6 | 0 | 6.362845  | -1.037712 | -0.816186 |
| 6 | 0 | 2.920141  | 1.966826  | -0.401600 |
| 6 | 0 | 4.208636  | 2.772317  | -0.329600 |
| 6 | 0 | 6.092639  | 2.151377  | 1.071864  |
| 6 | 0 | 6.222753  | 0.642645  | 0.887859  |
| 1 | 0 | 5.362114  | 0.140754  | 1.342046  |
| 1 | 0 | 6.773431  | 2.657527  | 0.370365  |

|   |   |          |           |           |          |  |
|---|---|----------|-----------|-----------|----------|--|
| 1 | 0 | 5.142063 | -2.625761 | -1.601878 |          |  |
| 1 | 0 | 6.973073 | -1.131726 | -1.724137 |          |  |
| 1 | 0 | 2.370648 | 2.201310  | -1.325674 |          |  |
| 1 | 0 | 3.970157 | 3.828199  | -0.526956 |          |  |
| 8 | 0 | 6.323739 | 0.343705  | -0.501623 |          |  |
| 8 | 0 | 4.772608 | 2.665313  | 0.969262  |          |  |
| 8 | 0 | 3.289681 | 0.593669  | -0.376650 |          |  |
| 8 | 0 | 4.261499 | -1.856941 | 0.103951  |          |  |
| 1 | 0 | 4.449341 | -0.994304 | -1.793333 |          |  |
| 1 | 0 | 6.860235 | -1.609624 | -0.017941 |          |  |
| 1 | 0 | 7.138105 | 0.300611  | 1.402050  |          |  |
| 1 | 0 | 6.408838 | 2.404763  | 2.089760  |          |  |
| 1 | 0 | 4.902415 | 2.419266  | -1.099800 |          |  |
| 1 | 0 | 2.282546 | 2.206697  | 0.459095  |          |  |
| 1 | 0 |          | -1.878810 | -2.027971 | 0.381788 |  |

Compound 2

|   |   |           |           |           |
|---|---|-----------|-----------|-----------|
| 6 | 0 | -0.719568 | -1.210650 | -0.277629 |
| 6 | 0 | 0.124264  | -0.121269 | -0.600521 |
| 6 | 0 | 1.492798  | -0.288856 | -0.748754 |
| 6 | 0 | 2.070996  | -1.578001 | -0.576009 |
| 6 | 0 | 1.245528  | -2.655036 | -0.260064 |
| 6 | 0 | -0.131454 | -2.470465 | -0.112187 |
| 6 | 0 | -2.162913 | -1.077252 | -0.108629 |
| 6 | 0 | -2.901741 | 0.050290  | -0.246181 |
| 1 | 0 | -0.304882 | 0.864671  | -0.731434 |
| 1 | 0 | 1.669596  | -3.643781 | -0.125137 |
| 1 | 0 | -0.756453 | -3.324344 | 0.136592  |
| 1 | 0 | -2.418848 | 0.986992  | -0.515270 |
| 6 | 0 | -6.616553 | -0.051539 | 0.309315  |
| 6 | 0 | -6.245301 | 1.260221  | -0.035282 |
| 6 | 0 | -7.191890 | 2.280881  | -0.124640 |
| 6 | 0 | -8.527103 | 1.962908  | 0.139748  |
| 6 | 0 | -8.901234 | 0.658713  | 0.483731  |
| 6 | 0 | -7.943004 | -0.362242 | 0.570882  |
| 6 | 0 | -5.354524 | -0.894598 | 0.313944  |
| 6 | 0 | -4.331349 | 0.198210  | -0.076389 |
| 1 | 0 | -6.887834 | 3.288305  | -0.392289 |
| 1 | 0 | -9.286031 | 2.738530  | 0.077670  |
| 1 | 0 | -9.945208 | 0.434062  | 0.685380  |
| 1 | 0 | -8.245635 | -1.372384 | 0.838921  |
| 7 | 0 | -4.863732 | 1.378929  | -0.260805 |
| 6 | 0 | -5.441576 | -2.019791 | -0.742459 |
| 1 | 0 | -6.264183 | -2.700636 | -0.495422 |
| 1 | 0 | -4.519421 | -2.607304 | -0.788682 |
| 1 | 0 | -5.631592 | -1.607123 | -1.738394 |
| 6 | 0 | -5.082767 | -1.470163 | 1.722624  |
| 1 | 0 | -5.891188 | -2.151981 | 2.010818  |
| 1 | 0 | -5.032531 | -0.670720 | 2.468724  |
| 1 | 0 | -4.141615 | -2.027185 | 1.758569  |
| 6 | 0 | 7.171038  | -1.002213 | 0.636177  |
| 6 | 0 | 7.152677  | 0.352623  | 1.321550  |
| 6 | 0 | 1.959931  | 2.054141  | -0.904524 |
| 6 | 0 | 3.198938  | 2.925454  | -0.985765 |
| 6 | 0 | 5.278382  | 3.271268  | 0.114392  |
| 6 | 0 | 6.191400  | 2.511156  | 1.059864  |
| 1 | 0 | 5.681359  | 2.373839  | 2.026508  |
| 1 | 0 | 5.704630  | 3.228068  | -0.899745 |
| 1 | 0 | 7.886970  | -1.670362 | 1.145008  |
| 1 | 0 | 8.188683  | 0.675444  | 1.528867  |

|   |   |          |           |           |          |  |
|---|---|----------|-----------|-----------|----------|--|
| 1 | 0 | 1.257758 | 2.338484  | -1.702537 |          |  |
| 1 | 0 | 2.885457 | 3.983532  | -1.035296 |          |  |
| 6 | 0 | 5.591002 | -2.497481 | -0.328053 |          |  |
| 6 | 0 | 4.106142 | -2.806519 | -0.302884 |          |  |
| 1 | 0 | 5.866479 | -2.112887 | -1.322555 |          |  |
| 1 | 0 | 3.797558 | -3.074681 | 0.716140  |          |  |
| 8 | 0 | 6.495950 | 1.265611  | 0.469027  |          |  |
| 8 | 0 | 3.416011 | -1.641291 | -0.736150 |          |  |
| 8 | 0 | 3.997362 | 2.673964  | 0.148300  |          |  |
| 8 | 0 | 2.372729 | 0.701951  | -1.052242 |          |  |
| 8 | 0 | 5.864426 | -1.543146 | 0.671916  |          |  |
| 1 | 0 | 3.893666 | -3.655286 | -0.970023 |          |  |
| 1 | 0 | 6.151144 | -3.434854 | -0.160328 |          |  |
| 1 | 0 | 7.511635 | -0.868522 | -0.401933 |          |  |
| 1 | 0 | 6.627084 | 0.265501  | 2.285830  |          |  |
| 1 | 0 | 7.108197 | 3.100225  | 1.241109  |          |  |
| 1 | 0 | 5.226723 | 4.331864  | 0.415628  |          |  |
| 1 | 0 | 3.749594 | 2.693029  | -1.910976 |          |  |
| 1 | 0 | 1.464631 | 2.196593  | 0.065053  |          |  |
| 1 |   | 0        | -2.664164 | -2.005075 | 0.154500 |  |

Compound 3

|   |   |            |           |           |
|---|---|------------|-----------|-----------|
| 6 | 0 | -1.491578  | -1.310058 | -0.408447 |
| 6 | 0 | -0.624255  | -0.254833 | -0.777757 |
| 6 | 0 | 0.724710   | -0.476388 | -1.012520 |
| 6 | 0 | 1.263900   | -1.784631 | -0.856044 |
| 6 | 0 | 0.411849   | -2.830467 | -0.505904 |
| 6 | 0 | -0.947474  | -2.593642 | -0.286139 |
| 6 | 0 | -2.916189  | -1.118912 | -0.155532 |
| 6 | 0 | -3.610739  | 0.042307  | -0.227095 |
| 1 | 0 | -1.021824  | 0.747062  | -0.880110 |
| 1 | 0 | 0.798876   | -3.836990 | -0.397247 |
| 1 | 0 | -1.591388  | -3.424864 | -0.010435 |
| 1 | 0 | -3.101585  | 0.964325  | -0.498671 |
| 6 | 0 | -7.294706  | 0.083656  | 0.512041  |
| 6 | 0 | -6.882882  | 1.388090  | 0.186487  |
| 6 | 0 | -7.786721  | 2.450479  | 0.172098  |
| 6 | 0 | -9.120621  | 2.181780  | 0.491952  |
| 6 | 0 | -9.535096  | 0.884875  | 0.816844  |
| 6 | 0 | -8.619671  | -0.178092 | 0.828864  |
| 6 | 0 | -6.072510  | -0.812480 | 0.430789  |
| 6 | 0 | -5.022004  | 0.246742  | 0.020856  |
| 1 | 0 | -7.451642  | 3.451588  | -0.081798 |
| 1 | 0 | -9.846802  | 2.990508  | 0.488674  |
| 1 | 0 | -10.577263 | 0.698923  | 1.062438  |
| 1 | 0 | -8.953309  | -1.182112 | 1.082783  |
| 7 | 0 | -5.509895  | 1.454146  | -0.103969 |
| 6 | 0 | -6.259365  | -1.900210 | -0.651403 |
| 1 | 0 | -7.098266  | -2.552980 | -0.384012 |
| 1 | 0 | -5.366749  | -2.523996 | -0.758745 |
| 1 | 0 | -6.478236  | -1.449787 | -1.624806 |
| 6 | 0 | -5.759287  | -1.441569 | 1.807596  |
| 1 | 0 | -6.585039  | -2.091886 | 2.118526  |
| 1 | 0 | -5.632069  | -0.667661 | 2.571250  |
| 1 | 0 | -4.846370  | -2.044174 | 1.779690  |
| 1 | 0 | -3.442320  | -2.030363 | 0.116306  |
| 6 | 0 | 1.235876   | 1.841801  | -1.317127 |
| 6 | 0 | 2.423832   | 2.676657  | -1.752019 |
| 6 | 0 | 6.684272   | 1.101024  | 2.290881  |
| 6 | 0 | 6.870609   | 2.486910  | 1.684817  |
| 6 | 0 | 5.837320   | 2.415914  | -0.462663 |
| 6 | 0 | 4.710202   | 3.032680  | -1.264955 |
| 1 | 0 | 4.884370   | 2.805870  | -2.330779 |
| 1 | 0 | 6.798022   | 2.678432  | -0.939851 |
| 1 | 0 | 0.387569   | 2.053379  | -1.984656 |



|   |   |          |           |           |
|---|---|----------|-----------|-----------|
| 1 | 0 | 2.723532 | 2.374925  | -2.769672 |
| 1 | 0 | 5.695454 | 1.037513  | 2.771478  |
| 1 | 0 | 6.932593 | 3.208420  | 2.508531  |
| 6 | 0 | 3.228558 | -3.135077 | -0.749134 |
| 6 | 0 | 4.732425 | -2.939533 | -0.753914 |
| 1 | 0 | 2.917329 | -3.480259 | 0.245319  |
| 1 | 0 | 5.202493 | -3.937580 | -0.702673 |
| 6 | 0 | 6.765643 | -1.213235 | 1.781275  |
| 1 | 0 | 5.972900 | -1.328184 | 2.536207  |
| 6 | 0 | 6.485865 | -2.169940 | 0.636462  |
| 1 | 0 | 6.808280 | -3.187724 | 0.918529  |
| 1 | 0 | 7.452568 | 0.954909  | 3.071928  |
| 1 | 0 | 7.826050 | 2.515070  | 1.134850  |
| 1 | 0 | 5.734416 | 1.325728  | -0.473073 |
| 1 | 0 | 4.712390 | 4.128909  | -1.147854 |
| 1 | 0 | 2.114387 | 3.736155  | -1.795056 |
| 1 | 0 | 0.944259 | 2.092052  | -0.288311 |
| 1 | 0 | 2.952364 | -3.900842 | -1.489578 |
| 1 | 0 | 5.052446 | -2.464816 | -1.694940 |
| 1 | 0 | 7.072106 | -1.863651 | -0.244420 |
| 1 | 0 | 7.727141 | -1.471892 | 2.257348  |
| 8 | 0 | 5.804755 | 2.922546  | 0.865368  |
| 8 | 0 | 3.478881 | 2.478658  | -0.842434 |
| 8 | 0 | 1.617295 | 0.473970  | -1.396425 |
| 8 | 0 | 2.601950 | -1.898343 | -1.062644 |
| 8 | 0 | 5.097544 | -2.155785 | 0.361978  |
| 8 | 0 | 6.807175 | 0.110689  | 1.284002  |

**1\*Li+**

|   |   |           |           |           |
|---|---|-----------|-----------|-----------|
| 6 | 0 | -0.093571 | -1.055586 | 0.090516  |
| 6 | 0 | 0.709344  | 0.083607  | -0.133985 |
| 6 | 0 | 2.089118  | -0.010907 | -0.094157 |
| 6 | 0 | 2.721724  | -1.243406 | 0.166454  |
| 6 | 0 | 1.950166  | -2.381510 | 0.367931  |
| 6 | 0 | 0.560576  | -2.281348 | 0.321305  |
| 6 | 0 | -1.555795 | -1.017628 | 0.072528  |
| 6 | 0 | -2.316499 | 0.099630  | 0.010080  |
| 1 | 0 | 0.259337  | 1.041110  | -0.373729 |
| 1 | 0 | 2.423511  | -3.335846 | 0.576829  |
| 1 | 0 | -0.034792 | -3.175149 | 0.482741  |
| 1 | 0 | -1.842736 | 1.078745  | -0.023468 |
| 6 | 0 | -6.064853 | -0.100497 | -0.034877 |
| 6 | 0 | -5.678207 | 1.251274  | -0.076126 |
| 6 | 0 | -6.618277 | 2.281135  | -0.125344 |
| 6 | 0 | -7.969325 | 1.928500  | -0.132833 |
| 6 | 0 | -8.360438 | 0.583875  | -0.092433 |
| 6 | 0 | -7.408746 | -0.444935 | -0.042813 |
| 6 | 0 | -4.800707 | -0.938815 | 0.014417  |
| 6 | 0 | -3.761348 | 0.200106  | -0.010658 |
| 1 | 0 | -6.297991 | 3.317835  | -0.156253 |
| 1 | 0 | -8.727936 | 2.704988  | -0.170368 |
| 1 | 0 | -9.417602 | 0.334008  | -0.099450 |
| 1 | 0 | -7.730205 | -1.483341 | -0.011608 |
| 7 | 0 | -4.281898 | 1.397682  | -0.061115 |
| 6 | 0 | -4.692122 | -1.853849 | -1.227584 |
| 1 | 0 | -5.520004 | -2.570994 | -1.234735 |
| 1 | 0 | -3.756124 | -2.422005 | -1.232363 |
| 1 | 0 | -4.742517 | -1.270368 | -2.152213 |
| 6 | 0 | -4.735215 | -1.763007 | 1.321399  |
| 1 | 0 | -5.568829 | -2.472680 | 1.355057  |
| 1 | 0 | -4.807563 | -1.114668 | 2.200214  |
| 1 | 0 | -3.805116 | -2.335945 | 1.394578  |
| 6 | 0 | 4.975763  | -2.197233 | -0.306102 |
| 6 | 0 | 6.393166  | -1.652025 | -0.128982 |
| 6 | 0 | 3.009015  | 2.189524  | 0.526762  |
| 6 | 0 | 4.350650  | 2.868313  | 0.265907  |
| 6 | 0 | 6.652875  | 2.012078  | -0.132926 |
| 6 | 0 | 7.316338  | 0.637496  | -0.047125 |
| 1 | 0 | 7.447764  | 0.357097  | 1.004136  |
| 1 | 0 | 6.563901  | 2.347118  | -1.177154 |
| 1 | 0 | 4.884050  | -3.156968 | 0.212671  |

|   |   |           |           |           |
|---|---|-----------|-----------|-----------|
| 1 | 0 | 7.113714  | -2.307137 | -0.630810 |
| 1 | 0 | 2.185937  | 2.891930  | 0.363409  |
| 1 | 0 | 4.503046  | 3.692762  | 0.972144  |
| 8 | 0 | 6.448882  | -0.322485 | -0.692133 |
| 8 | 0 | 5.348321  | 1.849265  | 0.444085  |
| 8 | 0 | 2.911943  | 1.081376  | -0.412036 |
| 8 | 0 | 4.109875  | -1.202098 | 0.282406  |
| 1 | 0 | 4.715054  | -2.335006 | -1.363494 |
| 1 | 0 | 6.636225  | -1.602387 | 0.938711  |
| 1 | 0 | 8.294366  | 0.653323  | -0.539908 |
| 1 | 0 | 7.244710  | 2.749452  | 0.422528  |
| 1 | 0 | 4.394671  | 3.264462  | -0.758621 |
| 1 | 0 | 2.961354  | 1.799258  | 1.548631  |
| 1 | 0 | -2.034832 | -1.990344 | 0.130454  |
| 3 | 0 | 4.679315  | 0.379914  | -0.552281 |

**1\*Na<sup>+</sup>**

|   |   |           |           |           |
|---|---|-----------|-----------|-----------|
| 6 | 0 | -0.093571 | -1.055586 | 0.090516  |
| 6 | 0 | 0.709344  | 0.083607  | -0.133985 |
| 6 | 0 | 2.089118  | -0.010907 | -0.094157 |
| 6 | 0 | 2.721724  | -1.243406 | 0.166454  |
| 6 | 0 | 1.950166  | -2.381510 | 0.367931  |
| 6 | 0 | 0.560576  | -2.281348 | 0.321305  |
| 6 | 0 | -1.555795 | -1.017628 | 0.072528  |
| 6 | 0 | -2.316499 | 0.099630  | 0.010080  |
| 1 | 0 | 0.259337  | 1.041110  | -0.373729 |
| 1 | 0 | 2.423511  | -3.335846 | 0.576829  |
| 1 | 0 | -0.034792 | -3.175149 | 0.482741  |
| 1 | 0 | -1.842736 | 1.078745  | -0.023468 |
| 6 | 0 | -6.064853 | -0.100497 | -0.034877 |
| 6 | 0 | -5.678207 | 1.251274  | -0.076126 |
| 6 | 0 | -6.618277 | 2.281135  | -0.125344 |
| 6 | 0 | -7.969325 | 1.928500  | -0.132833 |
| 6 | 0 | -8.360438 | 0.583875  | -0.092433 |
| 6 | 0 | -7.408746 | -0.444935 | -0.042813 |
| 6 | 0 | -4.800707 | -0.938815 | 0.014417  |
| 6 | 0 | -3.761348 | 0.200106  | -0.010658 |
| 1 | 0 | -6.297991 | 3.317835  | -0.156253 |
| 1 | 0 | -8.727936 | 2.704988  | -0.170368 |
| 1 | 0 | -9.417602 | 0.334008  | -0.099450 |
| 1 | 0 | -7.730205 | -1.483341 | -0.011608 |
| 7 | 0 | -4.281898 | 1.397682  | -0.061115 |
| 6 | 0 | -4.692122 | -1.853849 | -1.227584 |
| 1 | 0 | -5.520004 | -2.570994 | -1.234735 |
| 1 | 0 | -3.756124 | -2.422005 | -1.232363 |
| 1 | 0 | -4.742517 | -1.270368 | -2.152213 |
| 6 | 0 | -4.735215 | -1.763007 | 1.321399  |
| 1 | 0 | -5.568829 | -2.472680 | 1.355057  |
| 1 | 0 | -4.807563 | -1.114668 | 2.200214  |
| 1 | 0 | -3.805116 | -2.335945 | 1.394578  |
| 6 | 0 | 4.975763  | -2.197233 | -0.306102 |
| 6 | 0 | 6.393166  | -1.652025 | -0.128982 |
| 6 | 0 | 3.009015  | 2.189524  | 0.526762  |
| 6 | 0 | 4.350650  | 2.868313  | 0.265907  |
| 6 | 0 | 6.652875  | 2.012078  | -0.132926 |
| 6 | 0 | 7.316338  | 0.637496  | -0.047125 |
| 1 | 0 | 7.447764  | 0.357097  | 1.004136  |
| 1 | 0 | 6.563901  | 2.347118  | -1.177154 |
| 1 | 0 | 4.884050  | -3.156968 | 0.212671  |
| 1 | 0 | 7.113714  | -2.307137 | -0.630810 |

|   |   |           |           |           |
|---|---|-----------|-----------|-----------|
| 1 | 0 | 2.185937  | 2.891930  | 0.363409  |
| 1 | 0 | 4.503046  | 3.692762  | 0.972144  |
| 8 | 0 | 6.448882  | -0.322485 | -0.692133 |
| 8 | 0 | 5.348321  | 1.849265  | 0.444085  |
| 8 | 0 | 2.911943  | 1.081376  | -0.412036 |
| 8 | 0 | 4.109875  | -1.202098 | 0.282406  |
| 1 | 0 | 4.715054  | -2.335006 | -1.363494 |
| 1 | 0 | 6.636225  | -1.602387 | 0.938711  |
| 1 | 0 | 8.294366  | 0.653323  | -0.539908 |
| 1 | 0 | 7.244710  | 2.749452  | 0.422528  |
| 1 | 0 | 4.394671  | 3.264462  | -0.758621 |
| 1 | 0 | 2.961354  | 1.799258  | 1.548631  |
| 1 | 0 | -2.034832 | -1.990344 | 0.130454  |
| 3 | 0 | 4.679315  | 0.379914  | -0.552281 |

| 1*K <sup>+</sup> |   |           |           |           |
|------------------|---|-----------|-----------|-----------|
| 6                | 0 | -0.093571 | -1.055586 | 0.090516  |
| 6                | 0 | 0.709344  | 0.083607  | -0.133985 |
| 6                | 0 | 2.089118  | -0.010907 | -0.094157 |
| 6                | 0 | 2.721724  | -1.243406 | 0.166454  |
| 6                | 0 | 1.950166  | -2.381510 | 0.367931  |
| 6                | 0 | 0.560576  | -2.281348 | 0.321305  |
| 6                | 0 | -1.555795 | -1.017628 | 0.072528  |
| 6                | 0 | -2.316499 | 0.099630  | 0.010080  |
| 1                | 0 | 0.259337  | 1.041110  | -0.373729 |
| 1                | 0 | 2.423511  | -3.335846 | 0.576829  |
| 1                | 0 | -0.034792 | -3.175149 | 0.482741  |
| 1                | 0 | -1.842736 | 1.078745  | -0.023468 |
| 6                | 0 | -6.064853 | -0.100497 | -0.034877 |
| 6                | 0 | -5.678207 | 1.251274  | -0.076126 |
| 6                | 0 | -6.618277 | 2.281135  | -0.125344 |
| 6                | 0 | -7.969325 | 1.928500  | -0.132833 |
| 6                | 0 | -8.360438 | 0.583875  | -0.092433 |
| 6                | 0 | -7.408746 | -0.444935 | -0.042813 |
| 6                | 0 | -4.800707 | -0.938815 | 0.014417  |
| 6                | 0 | -3.761348 | 0.200106  | -0.010658 |
| 1                | 0 | -6.297991 | 3.317835  | -0.156253 |
| 1                | 0 | -8.727936 | 2.704988  | -0.170368 |
| 1                | 0 | -9.417602 | 0.334008  | -0.099450 |
| 1                | 0 | -7.730205 | -1.483341 | -0.011608 |
| 7                | 0 | -4.281898 | 1.397682  | -0.061115 |
| 6                | 0 | -4.692122 | -1.853849 | -1.227584 |
| 1                | 0 | -5.520004 | -2.570994 | -1.234735 |
| 1                | 0 | -3.756124 | -2.422005 | -1.232363 |
| 1                | 0 | -4.742517 | -1.270368 | -2.152213 |
| 6                | 0 | -4.735215 | -1.763007 | 1.321399  |
| 1                | 0 | -5.568829 | -2.472680 | 1.355057  |
| 1                | 0 | -4.807563 | -1.114668 | 2.200214  |
| 1                | 0 | -3.805116 | -2.335945 | 1.394578  |
| 6                | 0 | 4.975763  | -2.197233 | -0.306102 |
| 6                | 0 | 6.393166  | -1.652025 | -0.128982 |
| 6                | 0 | 3.009015  | 2.189524  | 0.526762  |
| 6                | 0 | 4.350650  | 2.868313  | 0.265907  |
| 6                | 0 | 6.652875  | 2.012078  | -0.132926 |
| 6                | 0 | 7.316338  | 0.637496  | -0.047125 |
| 1                | 0 | 7.447764  | 0.357097  | 1.004136  |
| 1                | 0 | 6.563901  | 2.347118  | -1.177154 |
| 1                | 0 | 4.884050  | -3.156968 | 0.212671  |
| 1                | 0 | 7.113714  | -2.307137 | -0.630810 |

|   |   |           |           |           |
|---|---|-----------|-----------|-----------|
| 1 | 0 | 2.185937  | 2.891930  | 0.363409  |
| 1 | 0 | 4.503046  | 3.692762  | 0.972144  |
| 8 | 0 | 6.448882  | -0.322485 | -0.692133 |
| 8 | 0 | 5.348321  | 1.849265  | 0.444085  |
| 8 | 0 | 2.911943  | 1.081376  | -0.412036 |
| 8 | 0 | 4.109875  | -1.202098 | 0.282406  |
| 1 | 0 | 4.715054  | -2.335006 | -1.363494 |
| 1 | 0 | 6.636225  | -1.602387 | 0.938711  |
| 1 | 0 | 8.294366  | 0.653323  | -0.539908 |
| 1 | 0 | 7.244710  | 2.749452  | 0.422528  |
| 1 | 0 | 4.394671  | 3.264462  | -0.758621 |
| 1 | 0 | 2.961354  | 1.799258  | 1.548631  |
| 1 | 0 | -2.034832 | -1.990344 | 0.130454  |
| 3 | 0 | 4.679315  | 0.379914  | -0.552281 |

**2\*Li<sup>+</sup>**

|   |   |            |           |           |
|---|---|------------|-----------|-----------|
| 6 | 0 | -0.816684  | -1.250773 | -0.146537 |
| 6 | 0 | 0.032971   | -0.132701 | -0.314987 |
| 6 | 0 | 1.403143   | -0.300682 | -0.410577 |
| 6 | 0 | 1.977229   | -1.582325 | -0.335678 |
| 6 | 0 | 1.159630   | -2.691547 | -0.163987 |
| 6 | 0 | -0.223794  | -2.519136 | -0.072096 |
| 6 | 0 | -2.271593  | -1.134420 | -0.041608 |
| 6 | 0 | -2.991500  | 0.006693  | -0.138437 |
| 1 | 0 | -0.396749  | 0.859665  | -0.361694 |
| 1 | 0 | 1.577627   | -3.689271 | -0.096820 |
| 1 | 0 | -0.852860  | -3.394052 | 0.061826  |
| 1 | 0 | -2.488893  | 0.955540  | -0.315719 |
| 6 | 0 | -6.732580  | -0.026095 | 0.189052  |
| 6 | 0 | -6.305172  | 1.294619  | -0.036181 |
| 6 | 0 | -7.210063  | 2.353706  | -0.109249 |
| 6 | 0 | -8.566892  | 2.063112  | 0.049527  |
| 6 | 0 | -8.998490  | 0.749700  | 0.274402  |
| 6 | 0 | -8.081703  | -0.309134 | 0.346188  |
| 6 | 0 | -5.499086  | -0.910292 | 0.208035  |
| 6 | 0 | -4.427694  | 0.171875  | -0.039076 |
| 1 | 0 | -6.859527  | 3.366046  | -0.284488 |
| 1 | 0 | -9.298255  | 2.864691  | -0.002027 |
| 1 | 0 | -10.059139 | 0.547971  | 0.394736  |
| 1 | 0 | -8.433050  | -1.323338 | 0.521167  |
| 7 | 0 | -4.909143  | 1.379598  | -0.168833 |
| 6 | 0 | -5.548878  | -1.954338 | -0.931556 |
| 1 | 0 | -6.400792  | -2.626856 | -0.783697 |
| 1 | 0 | -4.641020  | -2.565444 | -0.962716 |
| 1 | 0 | -5.667127  | -1.468584 | -1.905221 |
| 6 | 0 | -5.328995  | -1.594158 | 1.584448  |
| 1 | 0 | -6.174104  | -2.264683 | 1.774680  |
| 1 | 0 | -5.297390  | -0.853870 | 2.390089  |
| 1 | 0 | -4.411235  | -2.189263 | 1.631210  |
| 6 | 0 | 7.210838   | -1.018925 | 0.283481  |
| 6 | 0 | 7.343170   | 0.337249  | 0.938698  |
| 6 | 0 | 1.863285   | 2.068873  | -0.449273 |
| 6 | 0 | 3.059310   | 2.950117  | -0.733110 |
| 6 | 0 | 5.325791   | 3.250714  | -0.035469 |
| 6 | 0 | 6.383039   | 2.528498  | 0.768903  |
| 1 | 0 | 6.131822   | 2.532701  | 1.839236  |
| 1 | 0 | 5.625452   | 3.321047  | -1.090923 |
| 1 | 0 | 7.826238   | -1.763239 | 0.805940  |
| 1 | 0 | 8.365477   | 0.720675  | 0.821860  |



|   |   |           |           |           |
|---|---|-----------|-----------|-----------|
| 1 | 0 | 1.069177  | 2.280401  | -1.173938 |
| 1 | 0 | 2.819038  | 3.993684  | -0.490143 |
| 6 | 0 | 5.503603  | -2.562326 | -0.356483 |
| 6 | 0 | 4.030838  | -2.824833 | -0.134793 |
| 1 | 0 | 5.720164  | -2.427427 | -1.426267 |
| 1 | 0 | 3.825556  | -3.103323 | 0.906170  |
| 8 | 0 | 6.404429  | 1.187361  | 0.280867  |
| 8 | 0 | 3.355816  | -1.601182 | -0.441878 |
| 8 | 0 | 4.132724  | 2.474079  | 0.077560  |
| 8 | 0 | 2.323399  | 0.719500  | -0.576142 |
| 8 | 0 | 5.827966  | -1.368159 | 0.352635  |
| 3 | 0 | 4.432273  | 0.303491  | -0.042119 |
| 1 | 0 | 3.695729  | -3.631485 | -0.796548 |
| 1 | 0 | 6.092982  | -3.411106 | 0.015475  |
| 1 | 0 | 7.530194  | -0.970541 | -0.767404 |
| 1 | 0 | 7.107501  | 0.279686  | 2.011030  |
| 1 | 0 | 7.361525  | 3.008324  | 0.634072  |
| 1 | 0 | 5.167806  | 4.264656  | 0.355121  |
| 1 | 0 | 3.344249  | 2.893617  | -1.793808 |
| 1 | 0 | 1.478564  | 2.229259  | 0.565228  |
| 1 | 0 | -2.784783 | -2.076757 | 0.125620  |

**2\*Na<sup>+</sup>**

|   |   |            |           |           |
|---|---|------------|-----------|-----------|
| 6 | 0 | -0.982294  | -1.278835 | -0.183617 |
| 6 | 0 | -0.130457  | -0.169561 | -0.385020 |
| 6 | 0 | 1.240636   | -0.332446 | -0.492257 |
| 6 | 0 | 1.816068   | -1.620431 | -0.400583 |
| 6 | 0 | 0.990048   | -2.720189 | -0.200926 |
| 6 | 0 | -0.390876  | -2.546896 | -0.092833 |
| 6 | 0 | -2.435257  | -1.154729 | -0.061895 |
| 6 | 0 | -3.151198  | -0.012433 | -0.173487 |
| 1 | 0 | -0.557584  | 0.823123  | -0.451284 |
| 1 | 0 | 1.408542   | -3.717519 | -0.125949 |
| 1 | 0 | -1.018720  | -3.418776 | 0.064851  |
| 1 | 0 | -2.646573  | 0.929574  | -0.379077 |
| 6 | 0 | -6.886693  | -0.015256 | 0.213109  |
| 6 | 0 | -6.455403  | 1.297114  | -0.050362 |
| 6 | 0 | -7.355115  | 2.359815  | -0.134335 |
| 6 | 0 | -8.710862  | 2.081568  | 0.053017  |
| 6 | 0 | -9.146342  | 0.776570  | 0.316188  |
| 6 | 0 | -8.234759  | -0.285984 | 0.398564  |
| 6 | 0 | -5.658138  | -0.906376 | 0.233294  |
| 6 | 0 | -4.584780  | 0.163054  | -0.056607 |
| 1 | 0 | -7.001486  | 3.365441  | -0.339456 |
| 1 | 0 | -9.438290  | 2.886192  | -0.006088 |
| 1 | 0 | -10.206061 | 0.584341  | 0.458281  |
| 1 | 0 | -8.589292  | -1.293478 | 0.603278  |
| 7 | 0 | -5.061279  | 1.370370  | -0.207001 |
| 6 | 0 | -5.733050  | -1.977267 | -0.879703 |
| 1 | 0 | -6.587096  | -2.639548 | -0.701485 |
| 1 | 0 | -4.830083  | -2.595613 | -0.910500 |
| 1 | 0 | -5.863813  | -1.514470 | -1.862882 |
| 6 | 0 | -5.469112  | -1.558173 | 1.622769  |
| 1 | 0 | -6.313466  | -2.220834 | 1.841780  |
| 1 | 0 | -5.422432  | -0.799295 | 2.410179  |
| 1 | 0 | -4.552770  | -2.155508 | 1.669270  |
| 6 | 0 | 7.103437   | -1.049156 | 0.300894  |
| 6 | 0 | 7.262046   | 0.334056  | 0.908971  |
| 6 | 0 | 1.701838   | 2.056187  | -0.437848 |
| 6 | 0 | 2.891317   | 2.972780  | -0.668428 |
| 6 | 0 | 5.189404   | 3.272247  | -0.004294 |
| 6 | 0 | 6.282427   | 2.539801  | 0.755263  |
| 1 | 0 | 6.034111   | 2.485846  | 1.825385  |
| 1 | 0 | 5.439657   | 3.318794  | -1.074186 |
| 1 | 0 | 7.778261   | -1.755088 | 0.803460  |
| 1 | 0 | 8.305330   | 0.662825  | 0.808596  |

|    |   |           |           |           |
|----|---|-----------|-----------|-----------|
| 1  | 0 | 0.899150  | 2.343361  | -1.126756 |
| 1  | 0 | 2.595922  | 4.005986  | -0.440059 |
| 6  | 0 | 5.369432  | -2.627513 | -0.258954 |
| 6  | 0 | 3.879462  | -2.862432 | -0.076878 |
| 1  | 0 | 5.605878  | -2.496465 | -1.325403 |
| 1  | 0 | 3.632574  | -3.051938 | 0.975298  |
| 8  | 0 | 6.383592  | 1.220893  | 0.211582  |
| 8  | 0 | 3.195272  | -1.683676 | -0.524571 |
| 8  | 0 | 3.964838  | 2.554195  | 0.177177  |
| 8  | 0 | 2.132665  | 0.710951  | -0.691476 |
| 8  | 0 | 5.740176  | -1.452921 | 0.465295  |
| 11 | 0 | 4.293513  | 0.277215  | -0.046217 |
| 1  | 0 | 3.584932  | -3.732482 | -0.675168 |
| 1  | 0 | 5.918328  | -3.503764 | 0.112488  |
| 1  | 0 | 7.358258  | -1.022712 | -0.768599 |
| 1  | 0 | 7.003393  | 0.313834  | 1.977808  |
| 1  | 0 | 7.232926  | 3.079080  | 0.644281  |
| 1  | 0 | 5.095826  | 4.297857  | 0.377330  |
| 1  | 0 | 3.208538  | 2.927278  | -1.720952 |
| 1  | 0 | 1.333529  | 2.134373  | 0.592563  |
| 1  | 0 | -2.950174 | -2.090999 | 0.132078  |

**2\*K<sup>+</sup>**

|   |   |            |           |           |
|---|---|------------|-----------|-----------|
| 6 | 0 | -1.154772  | -1.321372 | -0.204718 |
| 6 | 0 | -0.294959  | -0.232302 | -0.455065 |
| 6 | 0 | 1.080798   | -0.396648 | -0.546021 |
| 6 | 0 | 1.649272   | -1.681690 | -0.398327 |
| 6 | 0 | 0.807438   | -2.767599 | -0.166419 |
| 6 | 0 | -0.570729  | -2.589601 | -0.067167 |
| 6 | 0 | -2.606874  | -1.182030 | -0.084535 |
| 6 | 0 | -3.304303  | -0.024240 | -0.138106 |
| 1 | 0 | -0.717965  | 0.756489  | -0.580586 |
| 1 | 0 | 1.221898   | -3.763806 | -0.058619 |
| 1 | 0 | -1.202435  | -3.452627 | 0.121894  |
| 1 | 0 | -2.782222  | 0.919481  | -0.283157 |
| 6 | 0 | -7.043006  | 0.015563  | 0.217930  |
| 6 | 0 | -6.586434  | 1.334042  | 0.042800  |
| 6 | 0 | -7.466785  | 2.415836  | 0.020801  |
| 6 | 0 | -8.828834  | 2.150553  | 0.179530  |
| 6 | 0 | -9.289446  | 0.839426  | 0.354477  |
| 6 | 0 | -8.397167  | -0.242356 | 0.375163  |
| 6 | 0 | -5.830235  | -0.896728 | 0.191515  |
| 6 | 0 | -4.735541  | 0.169360  | -0.019997 |
| 1 | 0 | -7.093871  | 3.426149  | -0.115789 |
| 1 | 0 | -9.541487  | 2.970367  | 0.167299  |
| 1 | 0 | -10.353575 | 0.657551  | 0.475826  |
| 1 | 0 | -8.770800  | -1.254475 | 0.512091  |
| 7 | 0 | -5.189781  | 1.392095  | -0.097938 |
| 6 | 0 | -5.909976  | -1.891728 | -0.989413 |
| 1 | 0 | -6.775587  | -2.551185 | -0.863746 |
| 1 | 0 | -5.015435  | -2.519846 | -1.051155 |
| 1 | 0 | -6.023074  | -1.363790 | -1.941521 |
| 6 | 0 | -5.668256  | -1.640463 | 1.537506  |
| 1 | 0 | -6.530190  | -2.294699 | 1.707937  |
| 1 | 0 | -5.609678  | -0.934791 | 2.372171  |
| 1 | 0 | -4.767294  | -2.262189 | 1.551644  |
| 6 | 0 | 6.889642   | -1.038015 | 0.734265  |
| 6 | 0 | 7.037989   | 0.366274  | 1.293526  |
| 6 | 0 | 1.563209   | 1.953408  | -0.307404 |
| 6 | 0 | 2.724110   | 2.914551  | -0.493286 |
| 6 | 0 | 5.008222   | 3.238389  | 0.192905  |
| 6 | 0 | 6.082204   | 2.547832  | 1.015256  |
| 1 | 0 | 6.975186   | 3.186826  | 1.069186  |
| 1 | 0 | 5.357022   | 3.412258  | -0.839277 |
| 1 | 0 | 7.354627   | -1.112928 | -0.263357 |
| 1 | 0 | 8.104511   | 0.609704  | 1.403050  |

|    |   |           |           |           |
|----|---|-----------|-----------|-----------|
| 1  | 0 | 0.701906  | 2.346338  | -0.860480 |
| 1  | 0 | 2.430135  | 3.897161  | -0.096364 |
| 6  | 0 | 5.166545  | -2.634491 | 0.205860  |
| 6  | 0 | 3.660544  | -2.810503 | 0.290154  |
| 1  | 0 | 5.516816  | -2.784789 | -0.830091 |
| 1  | 0 | 3.319768  | -2.710851 | 1.327169  |
| 8  | 0 | 6.393562  | 1.289658  | 0.415703  |
| 8  | 0 | 3.026163  | -1.803023 | -0.514744 |
| 8  | 0 | 3.855333  | 2.401351  | 0.197319  |
| 8  | 0 | 1.943951  | 0.659267  | -0.802360 |
| 8  | 0 | 5.496708  | -1.329212 | 0.660812  |
| 19 | 0 | 4.540999  | 0.258712  | -1.313076 |
| 1  | 0 | 3.410743  | -3.814640 | -0.072665 |
| 1  | 0 | 5.643799  | -3.403698 | 0.830476  |
| 1  | 0 | 7.404414  | -1.748008 | 1.397379  |
| 1  | 0 | 6.567748  | 0.407314  | 2.285360  |
| 1  | 0 | 5.705266  | 2.389789  | 2.034832  |
| 1  | 0 | 4.784162  | 4.217896  | 0.639166  |
| 1  | 0 | 2.951284  | 3.045574  | -1.565642 |
| 1  | 0 | 1.297952  | 1.870552  | 0.752875  |
| 1  | 0 | -3.135821 | -2.118462 | 0.066871  |

**3\*Li<sup>+</sup>**

|   |   |            |           |           |
|---|---|------------|-----------|-----------|
| 6 | 0 | -1.195355  | -1.080636 | -0.431677 |
| 6 | 0 | -0.351416  | 0.043898  | -0.306633 |
| 6 | 0 | 1.019977   | -0.081855 | -0.443659 |
| 6 | 0 | 1.606133   | -1.334279 | -0.693824 |
| 6 | 0 | 0.796096   | -2.460695 | -0.807129 |
| 6 | 0 | -0.587171  | -2.323399 | -0.679910 |
| 6 | 0 | -2.651136  | -1.009683 | -0.299827 |
| 6 | 0 | -3.379122  | 0.110911  | -0.090383 |
| 1 | 0 | -0.760336  | 1.023609  | -0.082527 |
| 1 | 0 | 1.222628   | -3.438734 | -1.000952 |
| 1 | 0 | -1.210302  | -3.208088 | -0.774334 |
| 1 | 0 | -2.883002  | 1.075877  | -0.007644 |
| 6 | 0 | -7.118129  | -0.047665 | 0.222010  |
| 6 | 0 | -6.705117  | 1.289778  | 0.356297  |
| 6 | 0 | -7.620980  | 2.319818  | 0.571141  |
| 6 | 0 | -8.974017  | 1.982374  | 0.650223  |
| 6 | 0 | -9.391192  | 0.651942  | 0.517388  |
| 6 | 0 | -8.463440  | -0.377307 | 0.301451  |
| 6 | 0 | -5.876205  | -0.891845 | 0.001091  |
| 6 | 0 | -4.816515  | 0.229004  | 0.050795  |
| 1 | 0 | -7.281292  | 3.345870  | 0.672257  |
| 1 | 0 | -9.713499  | 2.760479  | 0.816933  |
| 1 | 0 | -10.449065 | 0.413535  | 0.582555  |
| 1 | 0 | -8.803774  | -1.405311 | 0.200486  |
| 7 | 0 | -5.310678  | 1.422188  | 0.247995  |
| 6 | 0 | -5.921995  | -1.592089 | -1.376937 |
| 1 | 0 | -6.767201  | -2.288017 | -1.412567 |
| 1 | 0 | -5.008846  | -2.163559 | -1.572857 |
| 1 | 0 | -6.049529  | -0.864300 | -2.184437 |
| 6 | 0 | -5.694892  | -1.919624 | 1.142046  |
| 1 | 0 | -6.536887  | -2.620321 | 1.148272  |
| 1 | 0 | -5.660748  | -1.423510 | 2.117063  |
| 1 | 0 | -4.775109  | -2.501437 | 1.022270  |
| 1 | 0 | -3.158046  | -1.966278 | -0.385464 |
| 6 | 0 | 1.856569   | 2.010902  | -1.310447 |
| 6 | 0 | 2.911429   | 1.690369  | -2.363572 |
| 6 | 0 | 4.755313   | 0.903370  | 2.816338  |
| 6 | 0 | 5.757216   | 1.637162  | 1.931619  |
| 6 | 0 | 5.876008   | 2.428493  | -0.347603 |
| 6 | 0 | 4.928922   | 2.702971  | -1.499455 |
| 1 | 0 | 5.487105   | 2.998960  | -2.396819 |
| 1 | 0 | 6.404902   | 3.348614  | -0.065618 |
| 1 | 0 | 0.861763   | 2.071456  | -1.763290 |

|   |   |          |           |           |
|---|---|----------|-----------|-----------|
| 1 | 0 | 2.676784 | 0.748118  | -2.865325 |
| 1 | 0 | 3.957425 | 1.589621  | 3.113955  |
| 1 | 0 | 6.105187 | 2.551030  | 2.433422  |
| 6 | 0 | 3.697285 | -2.549159 | -0.917679 |
| 6 | 0 | 5.170173 | -2.166536 | -1.007099 |
| 1 | 0 | 3.482390 | -3.181601 | -0.046747 |
| 1 | 0 | 5.796476 | -3.066968 | -0.964688 |
| 6 | 0 | 4.626527 | -1.480716 | 2.254827  |
| 1 | 0 | 3.786220 | -2.142279 | 2.028124  |
| 6 | 0 | 5.805273 | -1.749923 | 1.314636  |
| 1 | 0 | 6.017989 | -2.826394 | 1.277480  |
| 1 | 0 | 5.244094 | 0.523411  | 3.721633  |
| 1 | 0 | 6.633881 | 1.016047  | 1.702412  |
| 1 | 0 | 6.614759 | 1.660965  | -0.618076 |
| 1 | 0 | 4.247443 | 3.517441  | -1.224964 |
| 1 | 0 | 2.957513 | 2.482577  | -3.121978 |
| 1 | 0 | 2.065985 | 2.957032  | -0.804532 |
| 1 | 0 | 3.398890 | -3.093654 | -1.822435 |
| 1 | 0 | 5.360426 | -1.655495 | -1.954541 |
| 1 | 0 | 6.710147 | -1.248903 | 1.672442  |
| 1 | 0 | 4.925546 | -1.661109 | 3.296099  |
| 8 | 0 | 5.062885 | 1.955998  | 0.727538  |
| 8 | 0 | 4.193640 | 1.497529  | -1.748607 |
| 8 | 0 | 1.876031 | 1.003709  | -0.273101 |
| 8 | 0 | 2.982119 | -1.317702 | -0.807348 |
| 8 | 0 | 5.550926 | -1.231534 | 0.003332  |
| 8 | 0 | 4.105448 | -0.158360 | 2.103538  |
| 3 | 0 | 3.915001 | 0.368469  | 0.053808  |

**3\*Na<sup>+</sup>**

|   |   |            |           |           |
|---|---|------------|-----------|-----------|
| 6 | 0 | -1.599748  | -1.395251 | -0.209946 |
| 6 | 0 | -0.736457  | -0.330125 | -0.556118 |
| 6 | 0 | 0.623607   | -0.540965 | -0.712099 |
| 6 | 0 | 1.174499   | -1.825409 | -0.524254 |
| 6 | 0 | 0.338306   | -2.883199 | -0.185473 |
| 6 | 0 | -1.033641  | -2.664440 | -0.033524 |
| 6 | 0 | -3.041681  | -1.222213 | -0.029788 |
| 6 | 0 | -3.726161  | -0.058999 | -0.120926 |
| 1 | 0 | -1.148618  | 0.659958  | -0.702559 |
| 1 | 0 | 0.735506   | -3.880882 | -0.039132 |
| 1 | 0 | -1.672563  | -3.502091 | 0.230559  |
| 1 | 0 | -3.200376  | 0.866602  | -0.346821 |
| 6 | 0 | -7.443773  | 0.047731  | 0.405353  |
| 6 | 0 | -6.984743  | 1.347455  | 0.127579  |
| 6 | 0 | -7.856630  | 2.435095  | 0.078647  |
| 6 | 0 | -9.212200  | 2.195259  | 0.315701  |
| 6 | 0 | -9.675073  | 0.902859  | 0.592865  |
| 6 | 0 | -8.791257  | -0.185022 | 0.640070  |
| 6 | 0 | -6.241320  | -0.878195 | 0.379571  |
| 6 | 0 | -5.148253  | 0.160634  | 0.051135  |
| 1 | 0 | -7.482386  | 3.430886  | -0.137824 |
| 1 | 0 | -9.917804  | 3.020724  | 0.284764  |
| 1 | 0 | -10.733904 | 0.740384  | 0.773726  |
| 1 | 0 | -9.166174  | -1.182741 | 0.856482  |
| 7 | 0 | -5.595486  | 1.381226  | -0.081070 |
| 6 | 0 | -6.386978  | -1.943852 | -0.731187 |
| 1 | 0 | -7.252422  | -2.582251 | -0.522831 |
| 1 | 0 | -5.503010  | -2.586419 | -0.795602 |
| 1 | 0 | -6.540437  | -1.474866 | -1.708168 |
| 6 | 0 | -6.022242  | -1.538537 | 1.760476  |
| 1 | 0 | -6.879459  | -2.173321 | 2.010294  |
| 1 | 0 | -5.921076  | -0.783051 | 2.546035  |
| 1 | 0 | -5.125253  | -2.165994 | 1.772526  |
| 1 | 0 | -3.576545  | -2.138542 | 0.202627  |
| 6 | 0 | 1.038883   | 1.714552  | -1.423470 |
| 6 | 0 | 2.218102   | 2.526701  | -1.907336 |
| 6 | 0 | 6.608575   | 0.926876  | 2.127972  |
| 6 | 0 | 6.449690   | 2.327558  | 1.576135  |
| 6 | 0 | 4.932055   | 3.652440  | 0.296744  |
| 6 | 0 | 4.223232   | 3.502177  | -1.033306 |
| 1 | 0 | 4.919676   | 3.142724  | -1.806734 |
| 1 | 0 | 4.282628   | 4.148830  | 1.030309  |
| 1 | 0 | 0.295196   | 1.619035  | -2.224313 |



|    |   |          |           |           |
|----|---|----------|-----------|-----------|
| 1  | 0 | 2.662552 | 2.075272  | -2.807248 |
| 1  | 0 | 5.832030 | 0.707642  | 2.877619  |
| 1  | 0 | 6.368974 | 3.042868  | 2.406873  |
| 6  | 0 | 3.136216 | -3.198054 | -0.634624 |
| 6  | 0 | 4.604701 | -3.027714 | -0.952201 |
| 1  | 0 | 3.015270 | -3.613866 | 0.374028  |
| 1  | 0 | 5.105279 | -4.000831 | -0.853354 |
| 6  | 0 | 6.902733 | -1.303443 | 1.339594  |
| 1  | 0 | 6.374750 | -1.670757 | 2.232488  |
| 6  | 0 | 6.552947 | -2.164861 | 0.147853  |
| 1  | 0 | 6.862466 | -3.202021 | 0.338334  |
| 1  | 0 | 7.589795 | 0.837337  | 2.615493  |
| 1  | 0 | 7.322350 | 2.598718  | 0.965008  |
| 1  | 0 | 5.832214 | 4.265327  | 0.155257  |
| 1  | 0 | 3.826819 | 4.476660  | -1.351936 |
| 1  | 0 | 1.879295 | 3.541245  | -2.159960 |
| 1  | 0 | 0.572297 | 2.202483  | -0.558224 |
| 1  | 0 | 2.670760 | -3.877767 | -1.359775 |
| 1  | 0 | 4.746776 | -2.668907 | -1.982208 |
| 1  | 0 | 7.070061 | -1.806722 | -0.754556 |
| 1  | 0 | 7.984587 | -1.343209 | 1.532719  |
| 8  | 0 | 5.277459 | 2.350274  | 0.767085  |
| 8  | 0 | 3.168521 | 2.565001  | -0.847752 |
| 8  | 0 | 1.540035 | 0.431300  | -1.052145 |
| 8  | 0 | 2.537393 | -1.906260 | -0.705379 |
| 8  | 0 | 5.139504 | -2.090722 | -0.021659 |
| 8  | 0 | 6.495796 | 0.024191  | 1.034582  |
| 11 | 0 | 4.059013 | 0.285851  | -0.057901 |

**3\*K+**

|   |   |            |           |           |
|---|---|------------|-----------|-----------|
| 6 | 0 | -1.693169  | -1.451324 | -0.262021 |
| 6 | 0 | -0.827087  | -0.395857 | -0.624590 |
| 6 | 0 | 0.532498   | -0.603525 | -0.802790 |
| 6 | 0 | 1.085063   | -1.892286 | -0.604370 |
| 6 | 0 | 0.238022   | -2.940658 | -0.255623 |
| 6 | 0 | -1.130864  | -2.721706 | -0.090656 |
| 6 | 0 | -3.130947  | -1.267731 | -0.060914 |
| 6 | 0 | -3.807532  | -0.098923 | -0.137717 |
| 1 | 0 | -1.239334  | 0.594543  | -0.765198 |
| 1 | 0 | 0.629862   | -3.939898 | -0.109016 |
| 1 | 0 | -1.767779  | -3.558018 | 0.182341  |
| 1 | 0 | -3.277724  | 0.823554  | -0.367272 |
| 6 | 0 | -7.516865  | 0.034800  | 0.437106  |
| 6 | 0 | -7.050576  | 1.332767  | 0.163201  |
| 6 | 0 | -7.913981  | 2.427852  | 0.132901  |
| 6 | 0 | -9.268485  | 2.197280  | 0.384688  |
| 6 | 0 | -9.738554  | 0.906629  | 0.657954  |
| 6 | 0 | -8.863265  | -0.188746 | 0.686462  |
| 6 | 0 | -6.322615  | -0.900786 | 0.390049  |
| 6 | 0 | -5.225240  | 0.131302  | 0.055171  |
| 1 | 0 | -7.534313  | 3.422141  | -0.081006 |
| 1 | 0 | -9.967641  | 3.028612  | 0.368331  |
| 1 | 0 | -10.796426 | 0.751432  | 0.850395  |
| 1 | 0 | -9.243737  | -1.184967 | 0.900007  |
| 7 | 0 | -5.663791  | 1.356534  | -0.062669 |
| 6 | 0 | -6.490227  | -1.957725 | -0.725945 |
| 1 | 0 | -7.357743  | -2.591098 | -0.511003 |
| 1 | 0 | -5.611900  | -2.606290 | -0.805531 |
| 1 | 0 | -6.652281  | -1.481091 | -1.697809 |
| 6 | 0 | -6.092233  | -1.572393 | 1.763697  |
| 1 | 0 | -6.952271  | -2.200584 | 2.020277  |
| 1 | 0 | -5.973662  | -0.823281 | 2.552924  |
| 1 | 0 | -5.201405  | -2.208652 | 1.759945  |
| 1 | 0 | -3.669423  | -2.180762 | 0.176061  |
| 6 | 0 | 0.905992   | 1.698143  | -1.429250 |
| 6 | 0 | 2.008751   | 2.527778  | -2.072658 |
| 6 | 0 | 6.670137   | 1.143772  | 1.923254  |
| 6 | 0 | 6.354207   | 2.481210  | 1.283739  |
| 6 | 0 | 4.599995   | 3.740187  | 0.283218  |
| 6 | 0 | 3.188891   | 3.611092  | -0.257390 |
| 1 | 0 | 2.870866   | 4.583252  | -0.660508 |
| 1 | 0 | 4.635295   | 4.556787  | 1.019467  |
| 1 | 0 | 0.063878   | 1.646867  | -2.130666 |

|    |   |          |           |           |
|----|---|----------|-----------|-----------|
| 1  | 0 | 2.313386 | 2.056525  | -3.012159 |
| 1  | 0 | 6.022988 | 0.976396  | 2.797817  |
| 1  | 0 | 6.560074 | 3.279764  | 2.011868  |
| 6  | 0 | 3.036762 | -3.286759 | -0.475231 |
| 6  | 0 | 4.540464 | -3.189724 | -0.638561 |
| 1  | 0 | 2.793689 | -3.575791 | 0.554899  |
| 1  | 0 | 4.971203 | -4.185716 | -0.459166 |
| 6  | 0 | 6.852242 | -1.183838 | 1.441339  |
| 1  | 0 | 6.342511 | -1.402938 | 2.391530  |
| 6  | 0 | 6.467584 | -2.222869 | 0.406473  |
| 1  | 0 | 6.846113 | -3.206043 | 0.721670  |
| 1  | 0 | 7.714591 | 1.156969  | 2.267940  |
| 1  | 0 | 7.000435 | 2.640863  | 0.407417  |
| 1  | 0 | 5.286552 | 3.985840  | -0.540393 |
| 1  | 0 | 2.498395 | 3.332214  | 0.552336  |
| 1  | 0 | 1.613975 | 3.527430  | -2.303029 |
| 1  | 0 | 0.545739 | 2.146473  | -0.493358 |
| 1  | 0 | 2.650432 | -4.052643 | -1.159839 |
| 1  | 0 | 4.802288 | -2.887817 | -1.665348 |
| 1  | 0 | 6.921149 | -1.976745 | -0.566380 |
| 1  | 0 | 7.937673 | -1.225548 | 1.614201  |
| 8  | 0 | 4.984142 | 2.507806  | 0.889527  |
| 8  | 0 | 3.197353 | 2.626213  | -1.290612 |
| 8  | 0 | 1.422684 | 0.388461  | -1.171598 |
| 8  | 0 | 2.450883 | -2.015204 | -0.772848 |
| 8  | 0 | 5.045392 | -2.248488 | 0.302656  |
| 8  | 0 | 6.474631 | 0.105945  | 0.964961  |
| 19 | 0 | 4.042979 | 0.221940  | -0.325735 |
